# Supplementary material for: Amorphous red phosphorus nanosheets anchored on graphene layers as high performance anodes for lithium ion batteries
Source: Royal Society of Chemistry journal article supplement (doi:10.1039/c7nr06476d), 2017-01-01
Supplement: c7nr06476d1.pdf [file c7nr06476d1.pdf]

Supplementary Information

**Amorphous red phosphorus nanosheets anchored on graphene layers as high  
performance anodes for lithium ion batteries**

Li Sun,\* Yu Zhang, Deyang Zhang, and Yihe Zhang\*

*Beijing Key Laboratory of Materials Utilization of Nonmetallic Minerals and Solid Wastes,  
National Laboratory of Mineral Materials, School of Materials Science and Technology,  
China University of Geosciences, Beijing, 100083, PR China*

*\*E-mail: sunli@cugb.edu.cn, zyh@cugb.edu.cn*

## Supplementary Figures

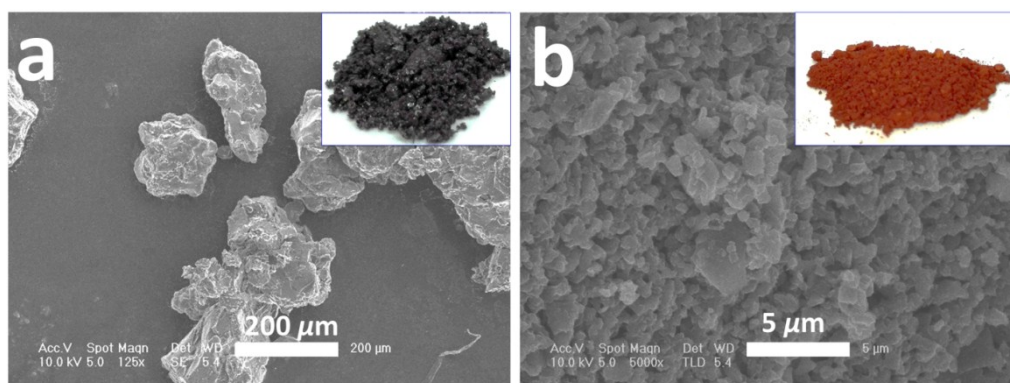

**Fig. S1.** SEM images of (a) commercial red P and (b) red P after ball-milling and hydrothermal treatment. The inset gives their photos.

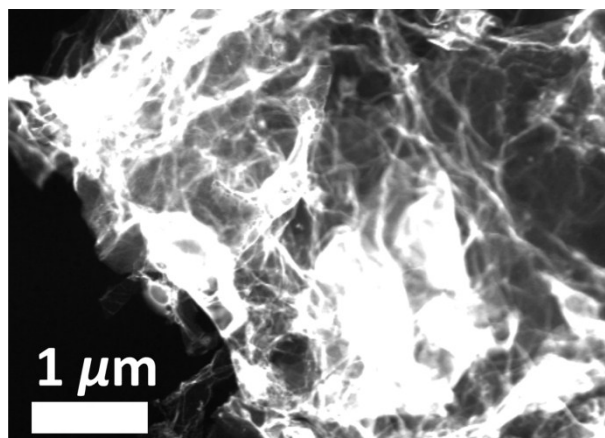

**Fig. S2.** STEM-HAADF image of the P/graphene composite.

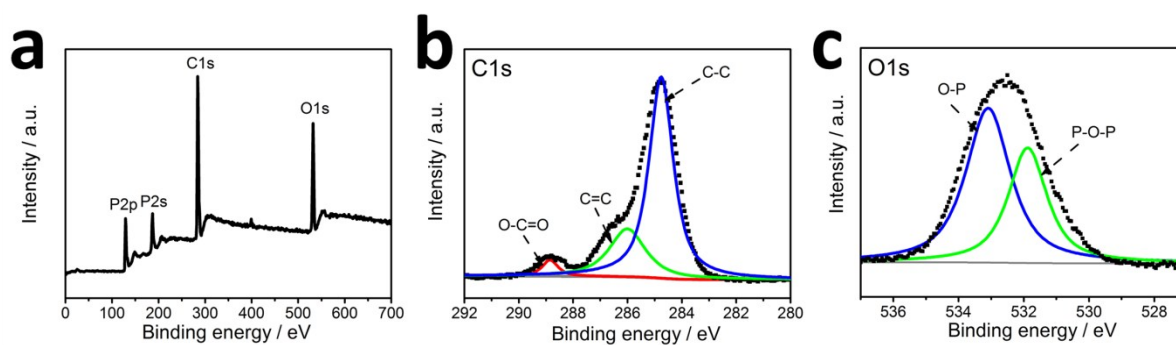

**Fig. S3.** XPS (a) survey spectra and high-resolution spectra of (b) C 1s, (c) O 1s.

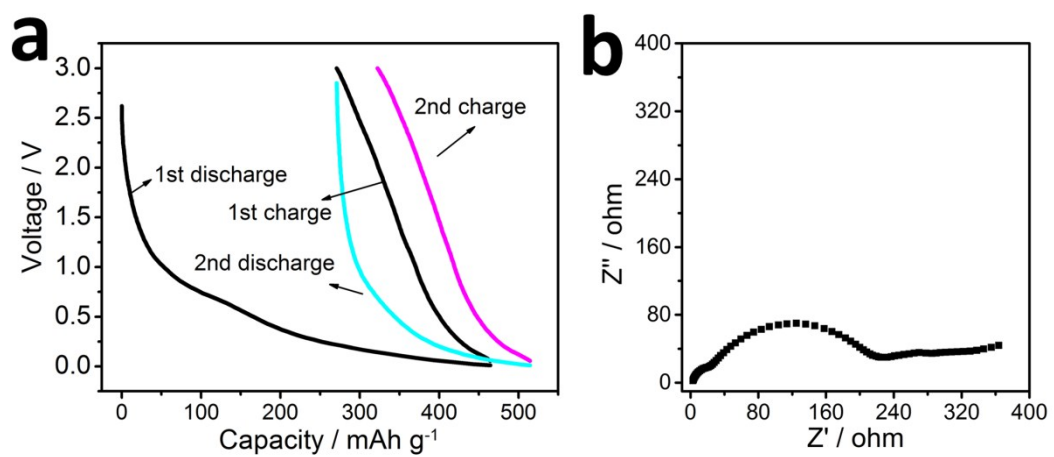

**Fig. S4.** (a) Voltage profiles of CNT at 200 mA g<sup>-1</sup>. (b) Electrochemical impedance spectra of red P.

**Table S1** Comparison of this work with previously reported P-graphene composites.

| <b>Composite</b>                                | <b>Method</b>                   | <b>P loading</b> | <b>Capacity based on the composite</b>                                         | <b>Reference</b> |
|-------------------------------------------------|---------------------------------|------------------|--------------------------------------------------------------------------------|------------------|
| P/graphene for LIBs                             | solution-based method           | 80%              | ~1024 mAh g <sup>-1</sup> (100 <sup>th</sup> cycle) at 200 mA g <sup>-1</sup>  | This work        |
| P-graphene for LIBs                             | ball-milling                    | 70%              | ~898 mAh g <sup>-1</sup> (300 <sup>th</sup> cycle) at 130 mA g <sup>-1</sup>   | Ref. 17          |
| Sandwich-like P/reduced graphene oxide for LIBs | high-pressure assisted spraying | 72%              | ~693 mAh g <sup>-1</sup> (50 <sup>th</sup> cycle) at 100 mA g <sup>-1</sup>    | Ref. 26          |
| P/N-doped graphene Paper for SIBs               | phase-transformation            | 66%              | ~1500 mAh g <sup>-1</sup> (100 <sup>th</sup> cycle) at 200 mA g <sup>-1</sup>  | Ref. 25          |
| P/Graphene Aerogel for SIBs                     | vapor-redistribution            | 80%              | ~1270 mAh g <sup>-1</sup> (100 <sup>th</sup> cycle) at ~200 mA g <sup>-1</sup> | Ref. 20          |
| P nano dots on reduced graphene oxide for SIBs  | vaporation and condensation     | 61.4%            | ~1000 mAh g <sup>-1</sup> (300 <sup>th</sup> cycle) at 1593 mA g <sup>-1</sup> | Ref. 27          |

**Table S2** Comparison of this work with previously reported P composite electrodes for lithium storage.

| <b>Composite</b>               | <b>Method</b>                          | <b>P loading</b> | <b>Capacity based on the composite</b>                                        | <b>Reference</b> |
|--------------------------------|----------------------------------------|------------------|-------------------------------------------------------------------------------|------------------|
| P/graphene                     | solution-based method                  | 80%              | ~1024 mAh g <sup>-1</sup> (100 <sup>th</sup> cycle) at 200 mA g <sup>-1</sup> | This work        |
| Red P@CMK-3 composite          | Vaporization –condensation –conversion | 60%              | 971 mAh g <sup>-1</sup> (85 <sup>th</sup> cycle) at 200 mA g <sup>-1</sup>    | Ref. 11          |
| Active carbon/red P composite  | Vaporization –condensation             | 60%              | 1370 mAh g <sup>-1</sup> (50 <sup>th</sup> cycle) at 140 mA g <sup>-1</sup>   | Ref. 16          |
| Amorphous red P/ CNT composite | Ball milling                           | 80%              | 798 mAh g <sup>-1</sup> (50 <sup>th</sup> cycle) at 130 mA g <sup>-1</sup>    | Ref. 28          |
